# Supplementary material for: Cancer histology in metastatic lymph node predicts prognosis in patients with node-positive stage IV colorectal cancer
Source: PeerJ. 2024 Jul 9;12:e17702. doi: 10.7717/peerj.17702 (PMC11243965; doi:10.7717/peerj.17702)
Supplement: Supplemental Information 1 [file peerj-12-17702-s001.xlsx]

## Sheet: Sheet1
Case	Lymph node metastasis histology (Tubular-type,1)	Lymph node metastasis histology (Cribiriform-type, 1)	Lymph node metastasis histology (Poorly differentiated-type, 1)	Age (>70, 1)	Gender (male, 1)	Tumore site (rectum, 1)	Primary tumor differentiation (por,1)	Tumore Depth (T4,1)	Lymphatic permeation (presence, 1)	Venous permeation (presence, 1)	Number of mLNs (>3, 1)	Synchronous metastasis (1)	Cancer specific survival time (months)	Censoring
1	0	1	0	1	0	0	0	0	1	0	1	0	8	0
2	0	1	0	1	0	0	0	0	1	0	1	1	26	0
3	0	0	1	1	1	0	0	0	1	0	1	0	4	0
4	0	0	1	0	1	1	0	0	1	1	0	1	5	0
5	0	1	0	1	1	1	0	0	1	0	0	0	59	0
6	0	1	0	0	1	1	0	0	0	0	0	0	34	0
7	1	0	0	0	1	1	0	0	1	0	1	1	60	1
8	0	1	0	1	0	1	0	0	1	0	0	0	27	0
9	0	1	0	0	1	0	0	1	1	0	0	1	22	0
10	0	1	0	0	0	0	0	0	1	0	0	0	31	0
11	0	1	0	0	1	1	0	0	1	0	1	0	60	1
12	0	0	1	1	0	0	1	0	1	1	0	0	34	0
13	0	1	0	0	1	1	0	0	0	1	0	1	50	0
14	1	0	0	0	1	0	0	1	1	0	1	0	60	1
15	1	0	0	1	1	1	0	0	1	0	0	0	48	0
16	0	1	0	1	1	0	0	0	1	1	1	1	12	0
17	0	1	0	1	0	1	0	0	1	1	1	0	48	0
18	0	1	0	1	0	0	0	0	1	1	1	0	14	0
19	0	1	0	0	1	0	0	0	0	1	0	0	8	0
20	0	1	0	0	0	0	0	1	1	0	1	1	56	0
21	0	1	0	0	0	1	0	0	1	1	0	1	60	1
22	0	1	0	0	1	1	0	1	1	1	0	1	26	0
23	1	0	0	0	0	1	0	0	1	0	0	1	60	1
24	1	0	0	1	0	1	0	0	1	0	1	1	5	0
25	0	0	1	1	1	0	0	1	1	1	1	1	7	0
26	0	1	0	1	1	1	0	1	1	1	0	0	27	0
27	0	1	0	1	0	1	0	0	0	0	1	0	60	1
28	0	1	0	1	0	1	0	0	1	1	0	1	19	0
29	1	0	0	1	0	0	0	0	1	1	0	1	33	0
30	0	1	0	0	0	1	0	0	1	1	1	1	50	0
31	0	1	0	1	0	0	0	1	1	1	1	1	2	0
32	0	1	0	0	0	1	0	0	0	1	1	0	50	0
33	0	0	1	1	0	0	0	1	1	1	1	0	19	0
34	0	0	0	0	1	0	0	0	0	0	0	0	60	1
35	0	1	0	1	0	1	0	0	1	1	0	0	38	0
36	0	1	0	1	0	0	0	0	0	1	0	1	60	1
37	0	1	0	1	1	0	0	0	1	0	0	1	16	0
38	1	0	0	1	1	1	0	0	1	1	0	1	60	1
39	0	1	0	1	0	0	0	0	1	0	1	0	53	0
40	1	0	0	0	1	1	0	0	1	1	1	1	60	1
41	0	0	1	1	1	0	0	0	1	0	0	1	6	0
42	0	1	0	1	0	0	0	1	1	0	1	0	7	0
43	0	1	0	1	1	0	0	1	1	1	0	1	3	0
44	0	1	0	1	1	0	0	1	1	0	0	1	1	0
45	0	1	0	0	1	0	0	1	1	0	1	1	8	0
46	0	1	0	0	0	0	0	1	1	1	0	1	14	0
47	0	1	0	1	0	1	0	1	1	1	1	0	23	0
48	0	1	0	1	1	0	0	0	1	1	0	1	27	0
49	0	1	0	0	1	1	0	0	1	1	0	0	60	1
50	0	1	0	0	0	1	0	0	1	0	1	0	10	0
51	0	1	0	1	1	0	0	0	0	1	1	0	60	1
52	0	1	0	1	1	1	0	1	1	1	1	0	60	1
53	0	1	0	0	1	1	0	1	1	1	1	1	22	0
54	0	1	0	1	1	0	0	1	1	1	0	0	54	0
55	1	0	0	1	1	1	0	1	1	1	1	0	37	0
56	1	0	0	0	1	1	0	0	1	1	1	1	60	1
57	0	1	0	0	1	0	0	0	1	1	1	1	25	0
58	1	0	0	1	1	0	0	0	0	1	1	0	60	1
59	1	0	0	0	1	1	0	0	1	1	1	0	60	1
60	0	1	0	0	0	0	1	0	1	1	1	0	52	0
61	1	0	0	1	0	0	0	0	1	1	1	0	60	1
62	0	1	0	1	0	0	0	0	1	1	0	1	16	0
63	1	0	0	1	0	0	0	0	1	0	0	0	60	1
64	0	1	0	1	1	1	0	0	1	1	1	1	16	0
65	1	0	0	1	0	1	0	0	1	0	1	0	60	1
66	0	0	1	1	0	0	1	1	1	1	1	0	11	0
67	0	0	1	0	1	0	0	1	1	1	0	1	51	0
68	0	1	0	0	0	0	0	1	1	0	1	1	11	0
69	0	1	0	0	1	0	0	0	1	1	1	1	17	0
70	0	1	0	1	1	1	0	0	1	1	0	0	40	0
71	0	1	0	1	0	0	0	1	1	1	1	1	10	0
72	0	0	1	0	1	0	0	0	1	1	1	0	19	0
73	0	1	0	0	0	0	0	0	1	1	0	0	16	0
74	0	0	1	1	1	0	1	1	0	1	1	1	5	0
75	0	1	0	1	0	1	0	0	1	1	1	0	13	0
76	0	1	0	1	1	0	0	1	1	1	1	0	12	0
77	0	0	1	1	0	1	0	0	1	1	1	0	24	0
78	0	1	0	1	1	1	0	0	0	1	0	1	33	0
79	0	0	1	0	1	0	1	1	1	1	1	1	28	0
80	0	1	0	0	0	0	0	1	1	0	0	1	60	1
81	0	1	0	1	1	0	0	0	1	1	1	1	40	0
82	0	1	0	0	0	0	0	1	1	0	0	1	19	0
83	1	0	0	0	1	0	0	0	1	0	0	0	40	0
84	0	1	0	1	1	0	0	1	1	1	0	1	23	1
85	0	1	0	0	1	1	0	1	0	0	0	1	60	1
86	0	0	1	1	1	1	1	0	1	1	1	0	1	0
87	0	0	1	1	0	0	1	1	1	0	1	1	4	0
88	0	0	1	1	0	0	0	1	1	0	1	1	10	0
